# Supplementary material
Source: MDPI journal article supplement (https://www.mdpi.com/2077-0472/12/8/1180)
Supplement: s1 [file s1]

**Table S1.** Descriptive statistics for technology adoption items and scales. M = mean; SD = standard deviation.

|                                                                                              | All Growers<br>(N = 176) |      | Yes, I currently<br>use (N = 52) |      | No, but<br>considering<br>(N = 74) |      | No, no plans<br>(N = 50) |      |
|----------------------------------------------------------------------------------------------|--------------------------|------|----------------------------------|------|------------------------------------|------|--------------------------|------|
| Items                                                                                        | M                        | SD   | M                                | SD   | M                                  | SD   | M                        | SD   |
| Automation will save me money on labour costs                                                | 3.83                     | 0.98 | 4.06                             | 0.87 | 4.07                               | 0.75 | 3.24                     | 1.14 |
| Automation will improve my work/life balance and allow time away from the farm               | 3.53                     | 1.01 | 3.65                             | 0.95 | 3.69                               | 0.95 | 3.18                     | 1.10 |
| Automation will allow me more time to work on other important aspects of the farm business   | 3.82                     | 0.88 | 3.96                             | 0.77 | 3.97                               | 0.81 | 3.44                     | 0.97 |
| Automation will help reduce the effort required to manage workers on my farm                 | 3.56                     | 1.00 | 3.67                             | 0.92 | 3.77                               | 0.88 | 3.12                     | 1.10 |
| Automated technology will do a better job than manual labour approaches on my farm           | 3.03                     | 0.99 | 3.40                             | 0.89 | 3.18                               | 0.93 | 2.42                     | 0.91 |
| I have the skills, or I can learn the skills, to use new automated technology on farm        | 4.06                     | 0.75 | 4.29                             | 0.54 | 4.22                               | 0.56 | 3.60                     | 0.97 |
| I can easily hire others with the skills to operate/maintain automated technology on my farm | 3.22                     | 1.09 | 3.25                             | 1.17 | 3.31                               | 1.08 | 3.06                     | 1.00 |
| Automated technology is easy to integrate into my current farm management systems            | 3.09                     | 1.11 | 3.35                             | 1.05 | 3.18                               | 1.09 | 2.70                     | 1.13 |
| My workers are capable of adapting in their work roles                                       | 3.54                     | 0.95 | 3.71                             | 0.89 | 3.61                               | 0.98 | 3.26                     | 0.92 |
| <b>Scales</b>                                                                                |                          |      |                                  |      |                                    |      |                          |      |
| Perceived Usefulness                                                                         | 3.55                     | 0.77 | 3.75                             | 0.66 | 3.74                               | 0.67 | 3.08                     | 0.83 |
| Perceived Ease of Use                                                                        | 3.48                     | 0.72 | 3.65                             | 0.63 | 3.58                               | 0.70 | 3.16                     | 0.76 |

**Table S2.** Descriptive statistics for attitudes toward workforce items and scales. (R) indicates reverse scoring completed such that a higher score is a more positive appraisal. M = Mean, SD = standard deviation

|                                                                                             | All Growers<br>(N = 176) |      | Yes, I currently<br>use (N = 52) |      | No, but<br>considering<br>(N = 74) |      | No, no plans<br>(N = 50) |      |
|---------------------------------------------------------------------------------------------|--------------------------|------|----------------------------------|------|------------------------------------|------|--------------------------|------|
| Items                                                                                       | M                        | SD   | M                                | SD   | M                                  | SD   | M                        | SD   |
| I have encouraged workers to give me their suggestions and feedback about farming matters   | 4.24                     | 0.80 | 4.29                             | 0.83 | 4.27                               | 0.65 | 4.15                     | 0.97 |
| I have had open discussions about skills development opportunities with workers on farm     | 4.04                     | 0.86 | 4.12                             | 0.91 | 4.00                               | 0.85 | 4.00                     | 0.85 |
| I have regularly provided feedback to my staff in relation to the performance of their jobs | 3.97                     | 0.89 | 4.04                             | 0.85 | 3.99                               | 0.87 | 3.88                     | 0.98 |

|                                                                                                               |      |      |      |      |      |      |      |      |
|---------------------------------------------------------------------------------------------------------------|------|------|------|------|------|------|------|------|
| Feedback from exit interviews with workers leaving the business has helped me reflect on how I manage workers | 3.32 | 1.05 | 3.49 | 1.03 | 3.32 | 1.01 | 3.15 | 1.11 |
| I have been able to trust workers on my farm to perform their job with little supervision                     | 4.03 | 0.89 | 4.08 | 0.87 | 4.03 | 0.83 | 3.98 | 1.00 |
| I do not really care who I have employed on farm as long as the job gets done (R)                             | 4.04 | 1.04 | 4.06 | 1.22 | 4.01 | 0.95 | 4.08 | 0.99 |
| Getting the right employees on farm is critical to my business success                                        | 4.44 | 0.77 | 4.57 | 0.78 | 4.41 | 0.65 | 4.33 | 0.91 |
| It is important to me that workers feel like a valued part of my farm business                                | 4.46 | 0.70 | 4.59 | 0.73 | 4.44 | 0.65 | 4.38 | 0.73 |
| I am satisfied with the staff we have on farm                                                                 | 4.14 | 0.85 | 4.27 | 0.80 | 4.04 | 0.92 | 4.15 | 0.77 |
| I find it difficult to get the staff I need for the farm to be at its most productive (R)                     | 2.69 | 1.21 | 2.73 | 1.31 | 2.61 | 1.19 | 2.79 | 1.15 |
| A lack of adequately skilled staff is negatively impacting my farm business (R)                               | 3.27 | 1.19 | 3.18 | 1.14 | 3.28 | 1.19 | 3.35 | 1.26 |
| A lack of engaged staff is negatively impacting my farm business (R)                                          | 3.41 | 1.10 | 3.45 | 1.05 | 3.31 | 1.10 | 3.50 | 1.17 |
| <b>Scales</b>                                                                                                 |      |      |      |      |      |      |      |      |
| People Management                                                                                             | 3.89 | 0.68 | 3.99 | 0.74 | 3.89 | 0.61 | 3.79 | 0.72 |
| Value of Workforce                                                                                            | 4.24 | 0.63 | 4.32 | 0.67 | 4.22 | 0.56 | 4.19 | 0.69 |
| Satisfaction with Workforce                                                                                   | 3.38 | 0.87 | 3.41 | 0.80 | 3.31 | 0.89 | 3.45 | 0.91 |
